1 **Solitary Lung Cavities on CT Imaging: Differentiating Malignant and Non-Malignant**  
2 **Diseases**

3 **Short title: Differentiation of Malignancy in Solitary Lung Cavities on CT Imaging**

4 **Zeliha Cosgun MD\***

5 **\* Bolu Abant Izzet Baysal University Hospital, Department of Radiology, Bolu, Turkey**

6

7 **Zeliha Cosgun**, M.D. Specialist in Radiology, Bolu Abant Izzet Baysal University, Izzet  
8 Baysal Training and Research Hospital, Bolu/Turkey. zeliha44@gmail.com; orcid.org/0000-  
9 0003-1996-1568

10

11 **Conflict of Interest:** None to declare.

12 **Financial disclosure:** This work has not been funded by any organization.

13

14 **Adress for correspondence:**

15 **Zeliha Cosgun MD**

16 Bolu Abant Izzet Baysal University Hospital, Department of Radiology, Bolu, Turkey,

17 14280, Golkoy, Bolu, Turkey

18 E mail: zeliha44@gmail.com

19 Phone number: +903742534656

20 Fax number: +90374253461

21

22

23

24 **NOTE:** This preprint reports new research that has not been certified by peer review and should not be used to guide clinical practice.

25 **Abstract**

26 **Background:** This study aims to explore how radiological findings contribute to distinguishing  
27 between benign and malignant diseases in patients with solitary cavitary lesions detected on  
28 CT.

29 **Methods:** We retrospectively assessed lesion size, cavity wall thickness, and additional  
30 parenchymal findings in diagnosing benign or malignant disease in these patients. Our study  
31 investigated the incidence and etiology of solitary pulmonary cavities. CT scans were reviewed  
32 by a single radiologist with expertise in thoracic radiology. The study was conducted using two  
33 64-multidetector CT systems, and measurements of lesion size and cavity wall thickness were  
34 recorded on axial images. Consolidation and centrilobular nodules were assessed based on  
35 predefined criteria. Receiver operating characteristic curves were generated to determine  
36 optimal cut-off points for distinguishing between malignant and non-malignant lesions based  
37 on cavity wall thickness.

38 **Results:** Non-malignant lesions accounted for 47.9% of cases, with active pulmonary  
39 tuberculosis being the most common diagnosis. In the malignant group, primary lung cancer  
40 predominated, squamous cell carcinoma being the most prevalent subtypes. Significant  
41 differences were noted between malignant and non-malignant cases regarding average  
42 maximum wall thickness and lesion diameter. Presence of perilesional consolidation or  
43 centrilobular nodules favored non-malignant diagnoses. Maximum wall thickness thresholds of  
44 7.2 mm or 23 mm were most accurate in suggesting non-malignant and malignant etiologies,  
45 respectively.

46 **Conclusions:** In conclusion, CT findings revealed significant distinctions between malignant  
47 and non-malignant solitary lung cavities; benign lesions generally exhibited smaller and thinner  
48 cavity walls, with accompanying perilesional parenchymal findings observed in benign lesions  
49 of infectious origin but not in malignant lesions.

50 **Key words;** *cavitary lesion, lung, benign and malign disease*

51

52

53

## 54 **Introduction**

55 A lung cavity is characterized as a gas-containing lesion within the lung, enclosed by a  
56 wall of variable thickness. An excavation is defined as the manifestation of a cavity, which may  
57 be situated within an opacity such as consolidation, mass, or nodule. Various mechanisms can  
58 lead to the formation of cavities, with the most common being tissue loss due to necrosis within  
59 a mass or nodule, which can be neoplastic, infectious, or ischemic in nature [1].

60 Cavitated lung lesions are commonly observed on imaging studies, with malignancies and  
61 infections representing the predominant origins. These lesions stem from various causes,  
62 leading to diverse etiologies and diagnostic challenges due to shared imaging features.

63 The spectrum of potential causes for cavitory lung lesions is extensive and encompasses  
64 infectious diseases like tuberculosis, fungal infections, and parasitic infections, as well as  
65 noninfectious conditions such as malignant and rheumatic lesions [2-4].

66 Conventional chest radiography and computed tomography (CT) are the primary imaging  
67 modalities utilized for pulmonary disease assessment., CT emerges as the most dependable and  
68 sensitive technique for cavitory lung lesion evaluation.

69 In solitary cavity lesions, multiple CT findings such as cavity diameter, cavity wall thickness,  
70 and the presence of parenchymal involvement surrounding the lesion aid in diagnosis. A recent  
71 study found that a cavity wall thickness of less than 7 mm is highly specific for benign disease,  
72 while thickness exceeding 24 mm is highly specific for malignant disease [5]. Additionally, the  
73 absence of perilesional parenchymal findings often supports malignancy, while their presence  
74 often suggests benignity [3].

75 The acute onset of symptoms can sometimes assist in distinguishing between malignant and  
76 non-malignant diseases. For example, a benign infection may cause hemoptysis when it affects  
77 a nearby vessel. Benign diseases can also lead to fatigue and weight loss similar to  
78 malignancies. The acute onset of fever generally helps differentiate benign disorders from  
79 malignancies, but lung cancer can manifest with a secondary superinfection to the tumor [6].

80 Therefore, correlating clinical and laboratory findings with radiological findings is essential in  
81 distinguishing between benign and malignant lesions. Preliminary diagnoses and differential  
82 diagnoses established based on radiological findings could be crucial for facilitating early

83 diagnosis. Hence, the aim of our study is to evaluate diagnostic CT findings in benign and  
84 malignant cavitory lung lesions.

## 85 **Methods**

86 In our cross sectional study, we retrospectively evaluated 186 patients with cavitory lung  
87 disease described on CT scans between 2015 and 2021. Among them, 105 patients with multiple  
88 cavitory lung lesions and no clinical-laboratory or pathological diagnosis were excluded. And  
89 2 case of fibrocavitory tuberculosis in the upper lobe, 6 cases of lobar necrotizing pneumonia  
90 were excluded (figure 1). Only 73 patients with solitary cavitory lesions and a confirmed  
91 diagnosis through clinical, laboratory, pathological findings, or follow-up imaging were  
92 included in our study. The images of these patients were reevaluated by a single radiologist  
93 with 9 years of experience in thoracic radiology and a total of 17 years of radiological  
94 experience, using the Picture Archiving and Communication System (PACS). This study was  
95 approved by our hospital's ethics committee (2021-233).

96 Examinations were conducted using two 64-multidetector CT systems (General Electric  
97 Revolution EVO, 64 slices). CT scans were performed without ECG gating, with the following  
98 scan parameters: 0.6 mm collimation, 1.5 mm slice thickness, 1.4 mm increment, 100 kV, 135  
99 mAs, a pitch of 0.9, and a gantry rotation time of 0.33 s. Intravenous administration of 100 cc  
100 nonionic contrast material was done using an automatic injector at a flow rate of 4 mL/s via a  
101 vein in the arm.

102 Each examination involved recording the lesion's size (maximum diameter) and the maximum  
103 wall thickness of the cavity, both measured on axial images, along with any associated findings,  
104 regardless of their location or extent. Images were volumetrically acquired and assessed using  
105 high-resolution and soft kernels on both pulmonary and mediastinal windows, respectively.  
106 Measurements were specifically conducted in the axial plane on the pulmonary window to  
107 enhance result reproducibility and employ a readily applicable technique.

108 Consolidation was defined as a uniform increase in lung attenuation that obscured the margins  
109 of adjacent vessels and airway walls. Centrilobular nodules were identified as nodular opacities  
110 situated at the center of a normal secondary pulmonary lobule, following the guidelines set forth  
111 by the Nomenclature Committee of the Fleischner Society.

112 The Statistical Package for the Social Sciences (SPSS) software (version 15, SPSS Inc.,  
113 Chicago, IL, US) for Windows was used for statistical analysis. Patients were categorized into

114 two groups based on their final diagnosis: malignant and non-malignant etiologies of solitary  
115 pulmonary cavities. Group variables were assessed using independent-sample Student's t-tests  
116 for numerical data with a normal distribution, and Chi-square tests for categorical data or  
117 proportions. All tests were two-tailed, with significance set at  $p < 0.05$ . Following initial  
118 analysis, receiver operating characteristic (ROC) curves were generated to identify optimal cut-  
119 off points for distinguishing between malignant and non-malignant lesions based on maximum  
120 wall thickness of the cavities.

## 121 **Results**

122       Upon reviewing CT images and medical records, 73 patients with solitary pulmonary  
123 cavities (35 benign, 38 malignant) were identified. The average age for benign lesions was  
124  $58 \pm 14$  years, whereas for malignant lesions it was  $64 \pm 9$  years. Among the total of 73 patients,  
125 15 (13.7%) were female. Of those with benign lesions, 10 were female and 25 were male, while  
126 among those with malignant lesions, 5 were female and 33 were male.

127 Non-malignant lesions accounted for 35 cases (47.9%), while 38 cases (52.1%) were malignant.  
128 Among the non-malignant diagnoses, mycobacterial infection sequelae comprised 5 cases  
129 (14.3%) (figure 2), active pulmonary tuberculosis 11 cases (31.4%) (figure 3), fungal infections  
130 4 cases (11.4%) (figure 4a and 4b), non-fungal infections 12 cases (34.3%) (figure 5a-b,6,7,8)  
131 and rheumatoid nodules 3 cases (8.6%) (figure 9).

132 Out of the 12 patients diagnosed with non-fungal infections, 2 were under follow-up with a  
133 diagnosis of hydatid cyst (figure 5a-b), 1 had *Streptococcus pneumoniae* (figure 6) as the  
134 pathogen, 2 had *Nocardia* (figure 7), and 1 had a bacterium other than the *Mycobacterium*  
135 tuberculosis complex (figure 8). In 6 patients, regression of the lesion on follow-up imaging led  
136 to the consideration of an infectious etiology for the lesion. Among the 4 patients diagnosed  
137 with fungal infections, *Aspergillus fumigatus* was detected in 2 cases (figure 4a), and *Candida*  
138 *albicans* in 2 cases (figure 4b).

139 In the malignant group, primary lung cancer was diagnosed in 32 patients, while 6 patients  
140 (15.8%) had metastases (figure 10a). Among primary lung cancers, there were 9 cases of  
141 adenocarcinoma (23.7%) (figure 10b), 23 cases of squamous cell carcinoma (60.5%) (figure  
142 10c). All malignant cases were histologically confirmed, whereas non-malignant cases were  
143 confirmed by clinical/radiological and laboratory findings, as well as follow-up imaging.

144 While benign lesions are most commonly observed in the apical segment (12 patients 34.3 %)  
145 of the right upper lobe, malignant lesions are most frequently detected in the anterior-posterior  
146 segment of the right upper lobe (8 patients 21.1 %).

147 In 11 out of 35 patients with benign lesions, accompanying perilesional consolidation areas and  
148 centrilobular nodules were observed. While perilesional parenchymal findings were not  
149 detected in malignant lesions, accompanying satellite nodules were observed in 6 patients  
150 ( $p<0.01$ ).

151 The maximum lesion diameter averages differed significantly between malignant and non-  
152 malignant groups. In the malignant group, the longest dimension was 47.7 mm (25-70), while  
153 in the benign group it was 30.9 mm (16-42) ( $p<0.01$ ). The maximum wall thickness at the  
154 thickest point of the cavity was 20.6 mm (8.8-35) in malignant cases, whereas it was 6.8 mm  
155 (3.8-7) in benign cases ( $p<0.01$ ).

156 Thresholds for maximum wall thickness associated with non-malignant and malignant lesions  
157 were identified: 7.2 mm was 84% specific and 77% sensitive for benignity, while 23 mm  
158 achieved a specificity of 97% and a sensitivity of 45% for malignant lesions (figure 11).

## 159 **Discussion**

160 The most significant result of our study is that lesion size and cavity wall thickness are  
161 significantly higher in malignant lesions compared to benign lesions. The study identified cutoff  
162 values for maximum wall thickness associated with non-malignant and malignant lesions: 7.2  
163 mm for benignity and 23 mm for malignancy. Similar to our study, many studies have  
164 emphasized the importance of imaging findings of cavitory lesions in contributing to diagnosis.  
165 Additionally, numerous studies in the literature have identified significant differences in cavity  
166 wall thickness between benign and malignant cavitory lesions, findings which are consistent  
167 with our study. According to Woodring et al. A wall thickness exceeding 15 mm indicated a  
168 likelihood of malignancy in X-ray scans [7,8], while Nin et al. Set the cutoff at greater than 24  
169 mm for CT scans [3].

170 Our study findings, in line with existing literature, suggest that increased cavity wall thickness  
171 in pulmonary lesions correlates with malignancy, likely associated with the invasive behavior  
172 of tumor cells, tissue damage, and the resultant inflammatory response due to necrosis. Previous  
173 research has indicated that heightened cavity wall thickness in malignant lesions may stem from  
174 the aggressive nature of tumor cells, which infiltrate surrounding tissues, leading to localized

175 tissue damage and subsequent inflammation. Furthermore, the observed inflammatory response  
176 may be attributed to the release of cytokines and other inflammatory mediators triggered by  
177 tumor cell necrosis and apoptosis. Additionally, emerging evidence suggests that the  
178 inflammatory milieu within the cavity may contribute to immune suppression, thereby  
179 facilitating tumor progression and metastasis. The association between increased cavity wall  
180 thickness and malignancy underscores the complex interplay between tumor biology and the  
181 host microenvironment, emphasizing the potential utility of cavity wall thickness as a  
182 diagnostic marker for malignancy in pulmonary lesions.

183 Another significant finding of our study, consistent with the literature, is the presence of  
184 perilesional centrilobular nodules and consolidations accompanying benign lesions [9-11].

185 In our study, the finding that perilesional consolidation observed in cavitory lesions supports  
186 benignity emerged as a significant observation. Consistent with the literature, perilesional  
187 consolidation is commonly associated with benign lesions, often attributed to infections,  
188 granulomatous diseases, and reactive changes. In this context, the presence of perilesional  
189 consolidation may decrease the likelihood of malignant lesions and support the benign nature  
190 of the lesion. However, it is crucial to note that perilesional consolidation alone is not sufficient  
191 for diagnosis, and clinical findings, imaging features, and histopathological examination when  
192 necessary should all be considered. This finding could serve as an additional evaluation  
193 criterion in the assessment of cavitory lesions in clinical practice, contributing to achieving  
194 more accurate diagnoses in the diagnostic process.

195 It's important to acknowledge certain limitations of this study. Firstly, due to its retrospective  
196 design, the authors were unable to rectify occasional inaccuracies in the databases. Secondly,  
197 the relatively small sample size precluded the possibility of conducting an analysis of  
198 covariance and other desired statistical tests. Lastly, the data were sourced from two tertiary-  
199 care centers, which may have populations differing from the general populace in certain aspects  
200 (such as the prevalence of immunosuppression).

201 In conclusion, our findings regarding increased cavity wall thickness and the presence of  
202 perilesional consolidation in pulmonary lesions provide valuable insights into the diagnostic  
203 evaluation of these lesions. The association of increased cavity wall thickness with malignancy  
204 and the supportive role of perilesional consolidation in benignity underscore the importance of  
205 thorough radiological assessment in guiding clinical decision-making. Incorporating these

206 imaging findings into the diagnostic algorithm can enhance the accuracy of diagnosing  
207 pulmonary lesions and facilitate appropriate patient management strategies.

## 208 **References**

- 209 1. Ben Romdhane MHB, Brillet P-Y, Brauner M. Syndrome cavitaire. EMC - Radiologie  
210 et imagerie médicale—cardiovasculaire—thoracique—cervicale. 2015;10:1–17. doi:  
211 10.1016/S1879-8535(14)66445-X.
- 212 2. Hansell DM, Bankier AA, McMahon H, McLoud TC, Müller NL, Remy J. Fleischner  
213 Society glossary of terms for thoracic imaging. *Radiology* 2008;246:697–722. doi:  
214 10.1148/radiol.2462070712.
- 215 3. Nin CS, de Souza VV, Alves GR, do Amaral RH, Irion KL, Marchiori E. Solitary lung  
216 cavities CT findings in malignant and non-malignant disease. *Clin Radio*. 2016;71:1132–36.  
217 doi: 10.1016/j.crad.2016.04.009.
- 218 4. Parkar A, Kandiah P. Differential Diagnosis of Cavitory Lung Lesions. *J Belg Soc*  
219 *Radiol* 2016;100:100. doi: 10.5334/jbr-btr.1202.
- 220 5. Guo J, Liang C, Sun Y, Zhou N, Liu Y and Chu X. Lung cancer presenting as thin-  
221 walled cysts: An analysis of 15 cases and review of literature. *Asia Pac J Clin Oncol*  
222 2016;12:105-12. doi.org/10.1111/ajco.12126.
- 223 6. Akinosoglou KS, Karkoulias K, Marangos M. Infectious complications in patients with  
224 lung cancer. *Eur Rev Med Pharmacol Sci* 2013;17:8-18.
- 225 7. Woodring JH, Fried AM, Chuang VP. Solitary cavities of the lung diagnostic  
226 implications of cavity wall thickness. *AJR Am J Roentgenol* 1980;135:1269-71. doi:  
227 10.2214/ajr.135.6.1269.
- 228 8. Woodring JH, Fried AM. Significance of wall thickness in solitary cavities of the lung  
229 a follow-up study. *AJR Am J Roentgenol* 1983;140:473-4. doi: 10.2214/ajr.140.3.473.
- 230 9. Burrill J, Williams CJ, Bain G, Conder G, Hine AL, Misra RR. Tuberculosis a  
231 radiological review. *Radiographics* 2007;27:1255-73. doi: 10.1148/rg.275065176.



- 232 10. Rossi SE, Franquet T, Volpacchio M, Giménez A, Aguilar G. Tree-in-bud pattern at  
233 thin-section CT of the lungs radiologic-pathologic overview. *Radiographics* 2005;25:789–801.  
234 doi: 10.1148/rg.253045115.
- 235 11. Collins J, Blankenbaker D, Stern EJ. CT patterns of bronchiolar disease what is "tree-  
236 in-bud"? *AJR Am J Roentgenol* 1998;171:365–370. doi: 10.2214/ajr.171.2.9694453.

**Figure 1:** Thoracic CT, axial images in parenchymal window, Consolidation areas with air bronchograms and accompanying cavities, located in the posterior aspect of the right upper lobe and the superior segment of the right lower lobe, consistent with necrotizing pneumonia(a). Follow-up imaging after one year: Regression of pneumonic infiltrates with residual changes and volume loss in the same localization, indicative of sequelae (b).

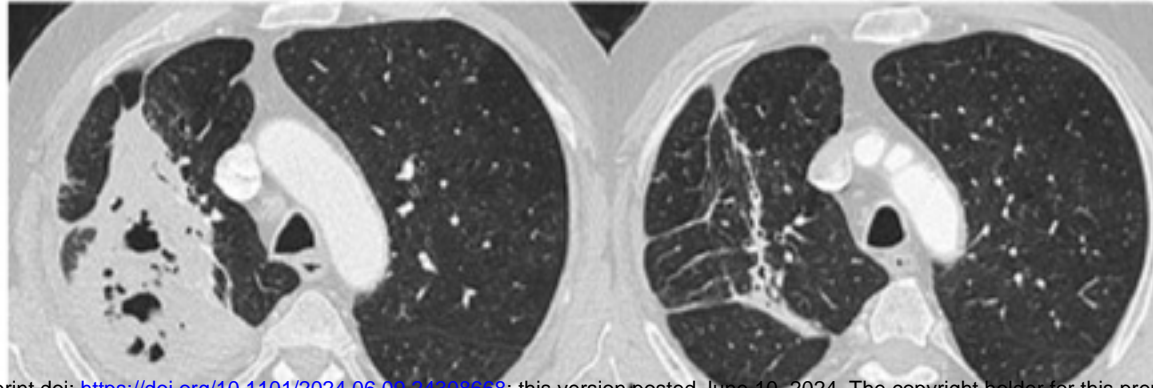

medRxiv preprint doi: <https://doi.org/10.1101/2024.06.09.24309668>; this version posted June 10, 2024. The copyright holder for this preprint (which was not certified by peer review) is the author/funder, who has granted medRxiv a license to display the preprint in perpetuity. It is made available under a [CC-BY 4.0 International license](https://creativecommons.org/licenses/by/4.0/).

**Figure 2:** In a patient with a history of previous tuberculosis (TB), a cavitory lesion with a stable thin wall in the apicoposterior segment of the left lung was interpreted as consistent with a sequel TB cavity.

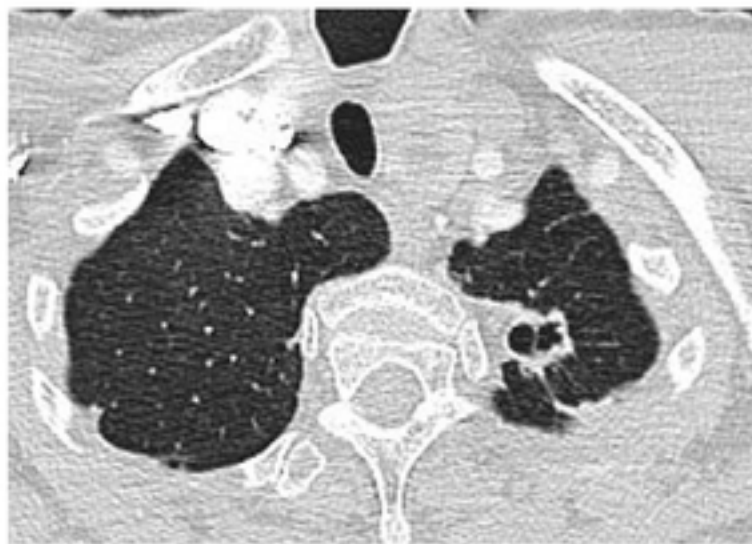

**Figure 3:** In a patient diagnosed with active tuberculosis (TB), a cavitory lesion in the superior segment of the right lower lobe of the lung and widespread tree-in-bud opacities in the bilateral lung parenchyma, consistent with endobronchial spread, were observed.

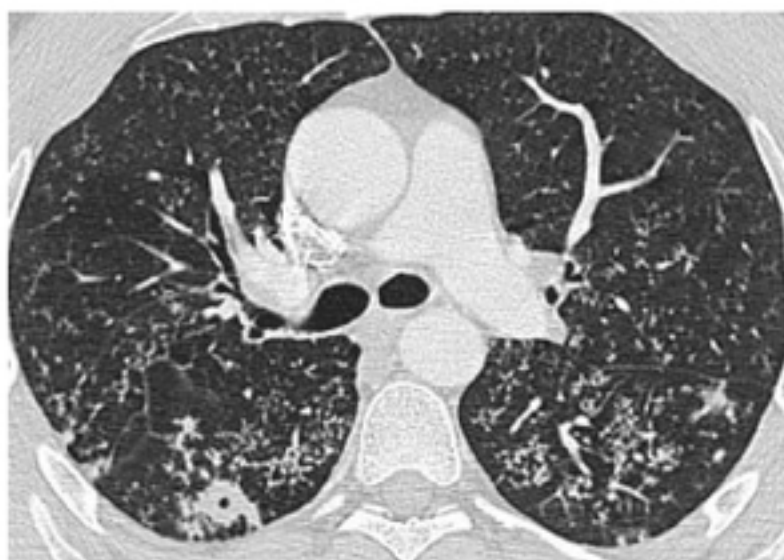

**Figure 4:** Fungal infections, In a patient diagnosed with *Aspergillus fumigatus*, a fungus ball within the cavity was observed in the left lung following left upper lobectomy(a). In a patient diagnosed with *Candida albicans*, a cavitory lesion containing a solid component was observed in the left lower lobe of the lung(b).

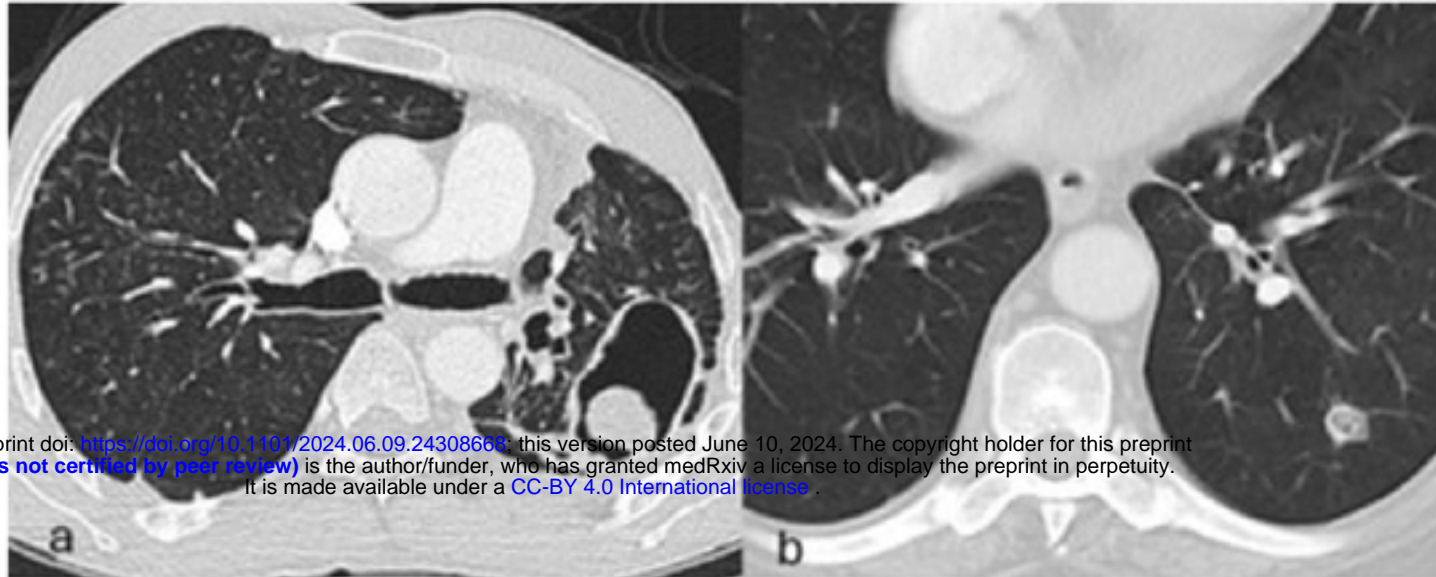

**Figure 5:** A cavitory lesion observed in the right lung apex (a) , patient followed up with a diagnosis of hydatid cyst, demonstrates regression (b) after hydatid cyst treatment.

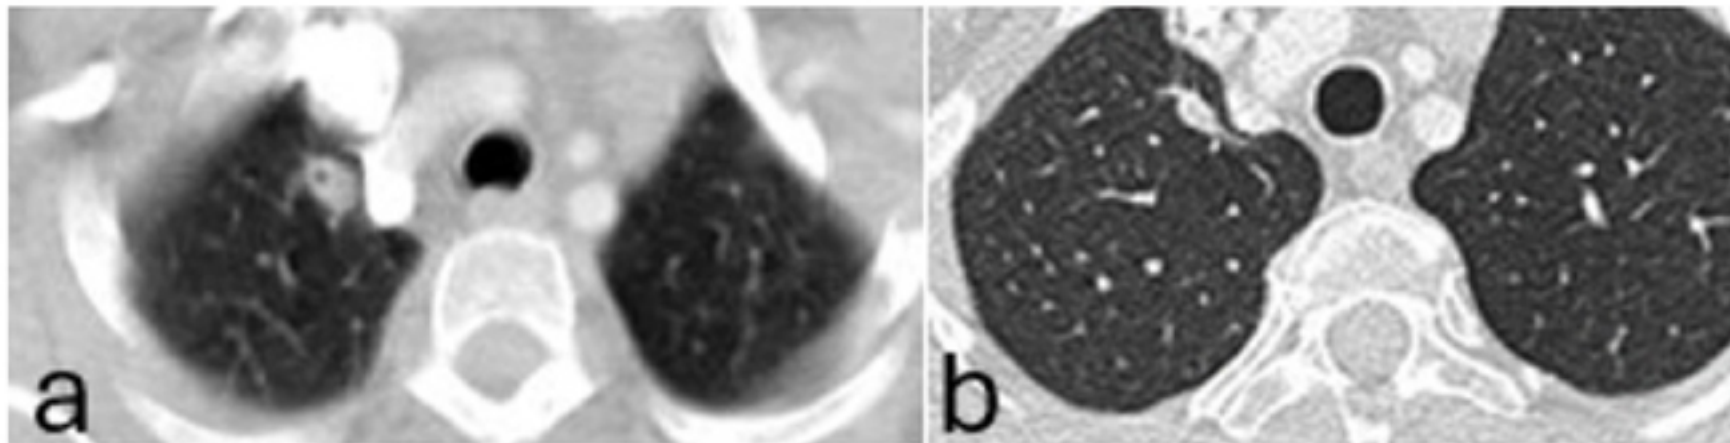

**Figure 6:** In a patient diagnosed with *Streptococcus pneumoniae*, a cavitory lesion in the posterior basal segment of the right lower lobe of the lung accompanied by perilesional ground-glass opacities.

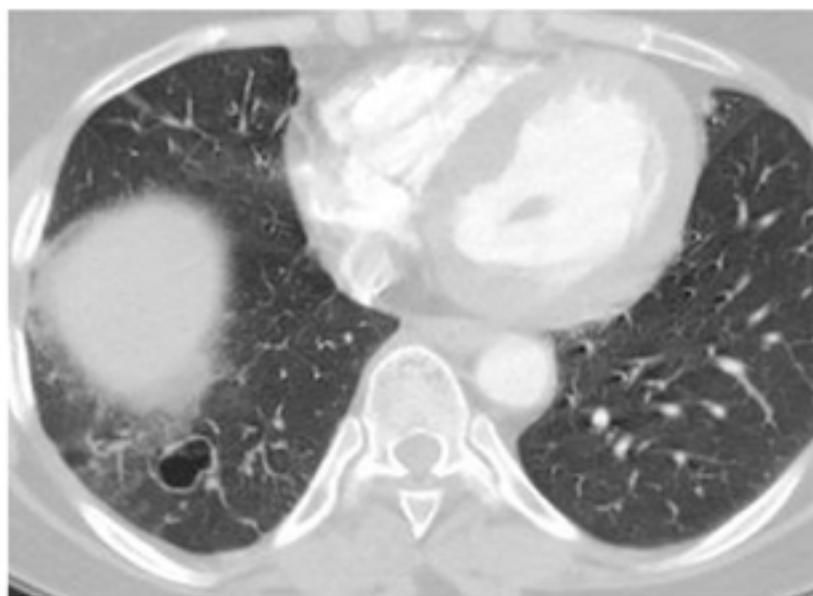

**Figure 7:** In a patient diagnosed with Nocardia, a cavitory lesion accompanied by perilesional consolidation was observed in the right lower lobe of the lung.

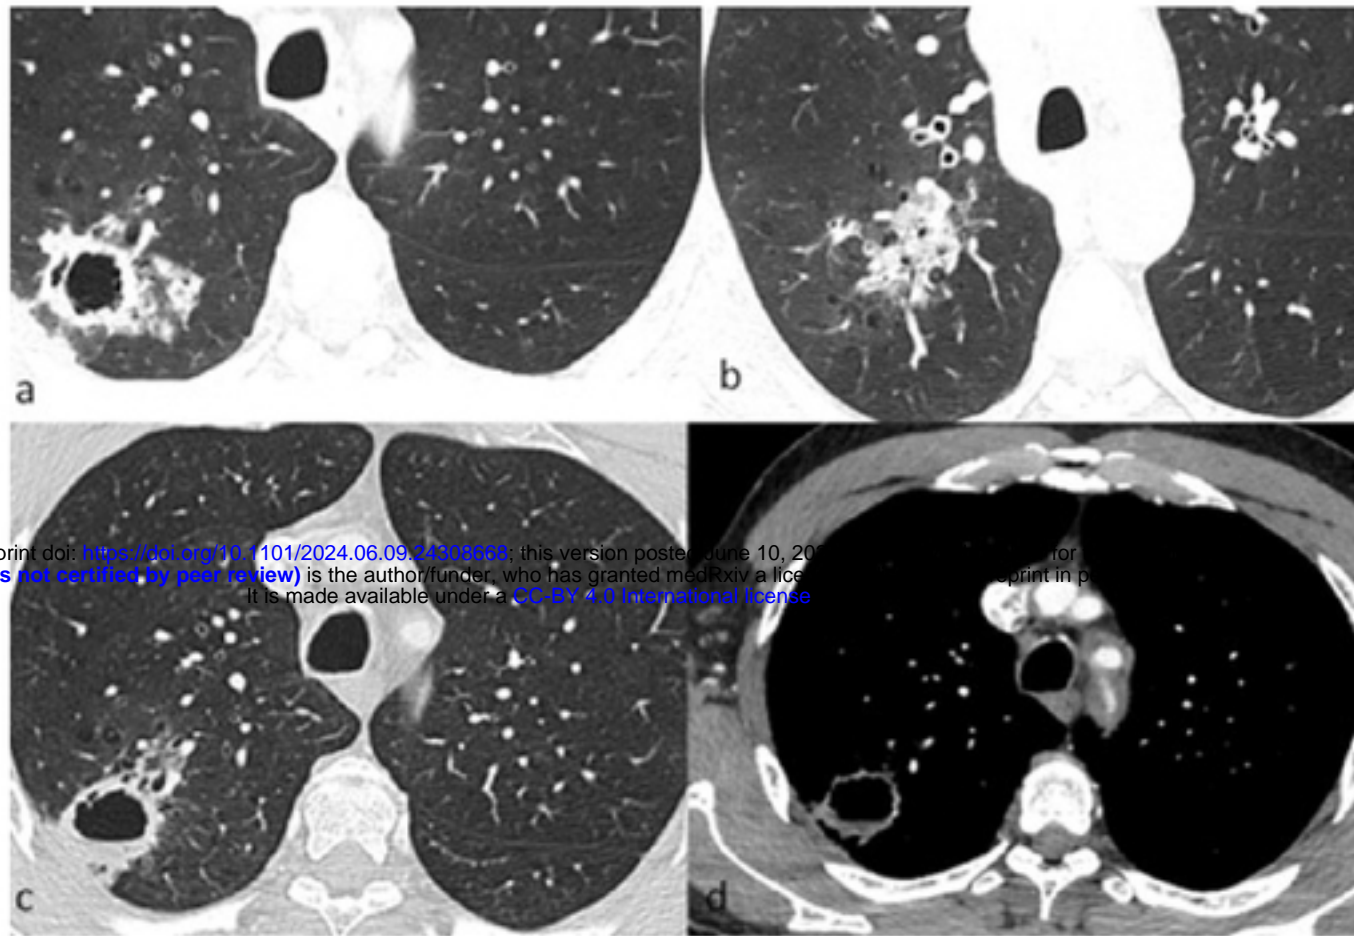

medRxiv preprint doi: <https://doi.org/10.1101/2024.06.09.24308699>; this version posted June 10, 2024. The copyright holder for this preprint (which was not certified by peer review) is the author/funder, who has granted medRxiv a license to display the preprint in perpetuity. It is made available under a [CC-BY 4.0 International license](https://creativecommons.org/licenses/by/4.0/).

**Figure 8:** In a patient diagnosed with nontuberculous mycobacteria, a thin-walled cavitory lesion is observed in the left lower lobe of the lung.

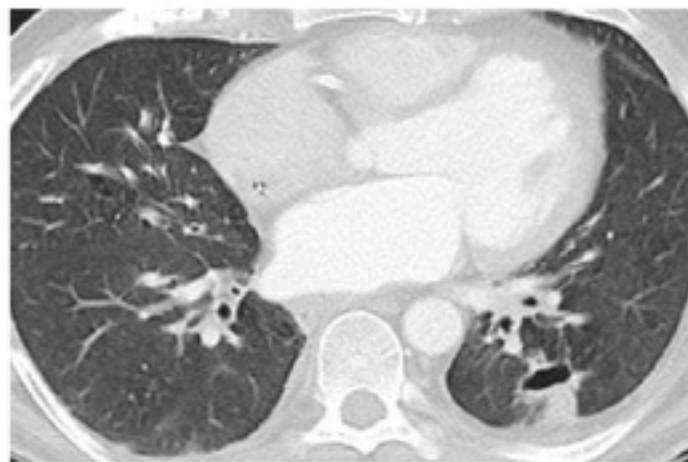

**Figure 9:** A cavitory lesion consistent with rheumatoid nodule, pathologically diagnosed in the left lower lobe of the lung

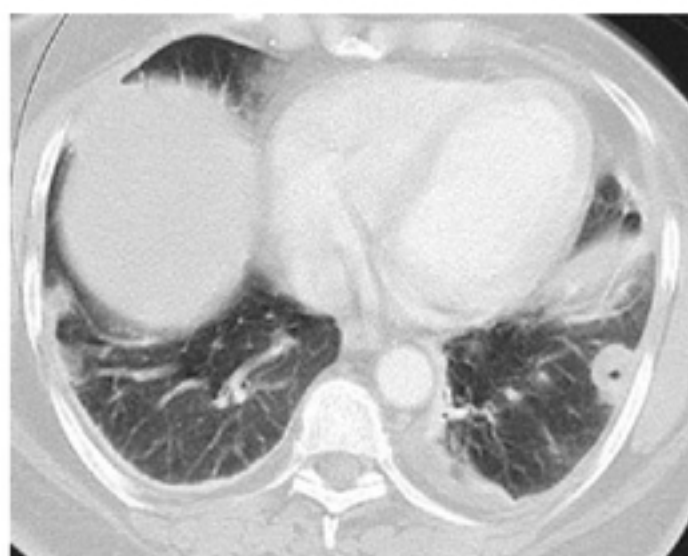

**Figure 10:** In a patient followed up with a diagnosis of bladder cancer, pathologically diagnosed with metastasis, a single cavitory lesion is observed in the superior segment of the right upper lobe of the lung (a). Primary lung adenocancer (b) and Squamous cell carcinoma in the background of UIP pattern (c).

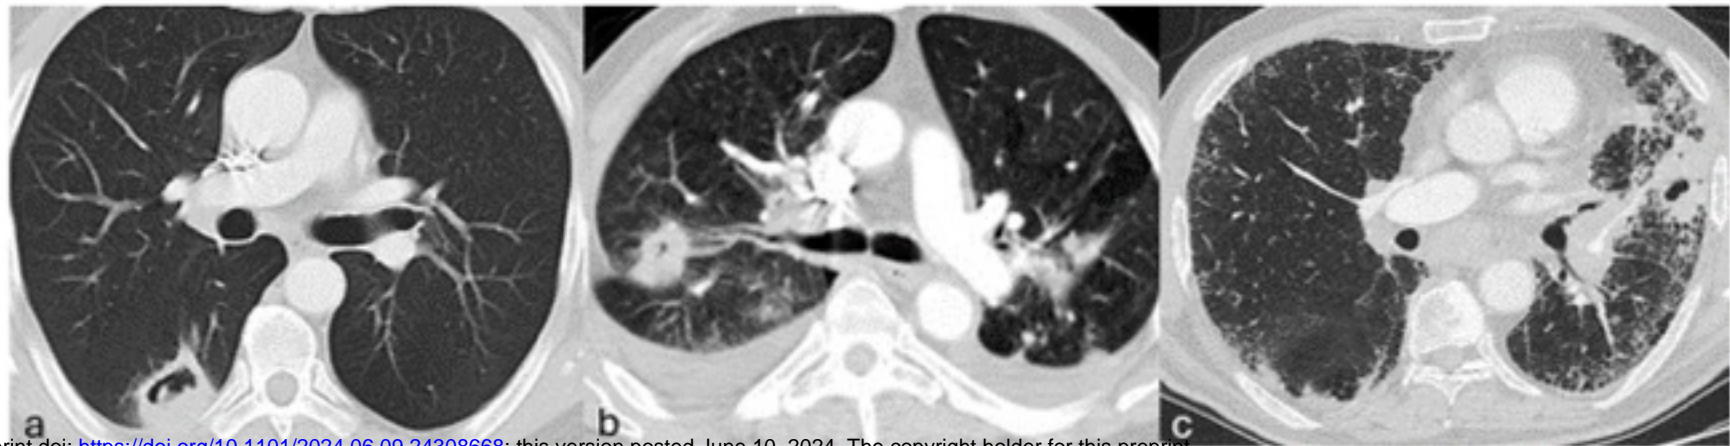

medRxiv preprint doi: <https://doi.org/10.1101/2024.06.09.24308668>; this version posted June 10, 2024. The copyright holder for this preprint (which was not certified by peer review) is the author/funder, who has granted medRxiv a license to display the preprint in perpetuity. It is made available under a [CC-BY 4.0 International license](https://creativecommons.org/licenses/by/4.0/).

**Figure 11:** ROC analysis in maximum wall thickness associated with malignant cavities lesions

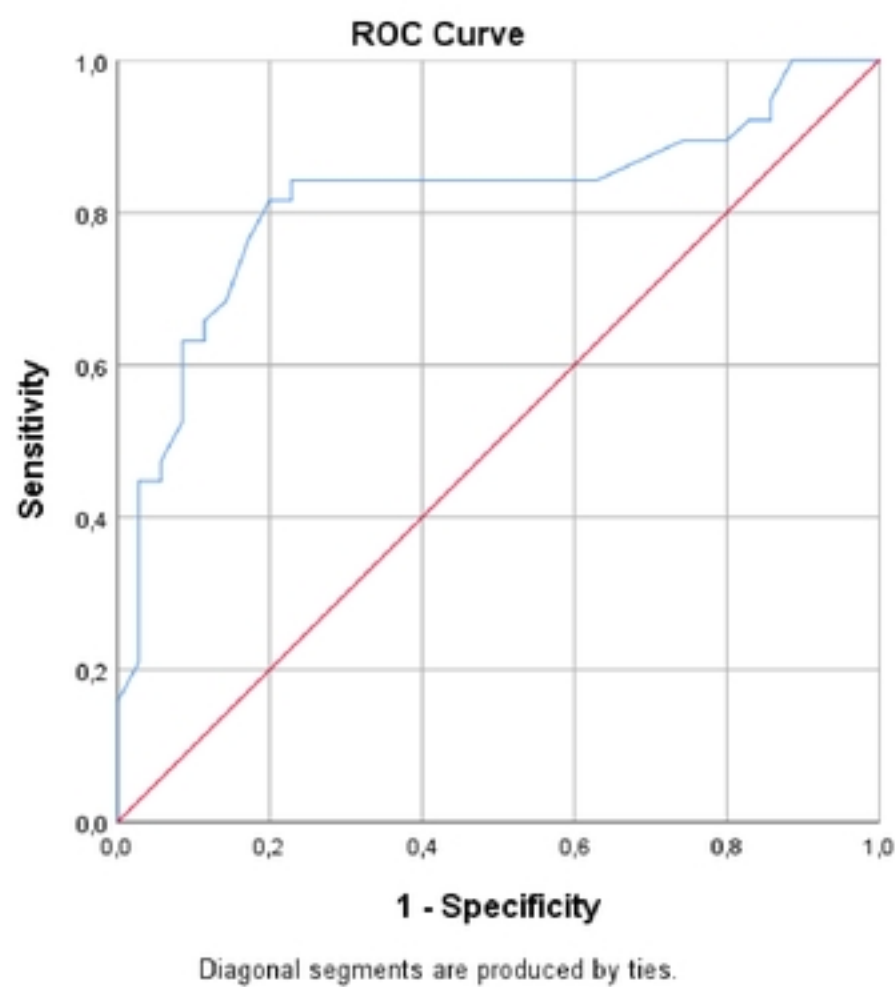

**Table 1:** Receiver operating characteristic curves analysis in maximum wall thickness associated with malignant cavities lesions

| Risc factor            | AUC (95%)              | Cutt of | P value | Sensitivity (%) | Spesivity (%) |
|------------------------|------------------------|---------|---------|-----------------|---------------|
| Maximum wall thickness | 0.818<br>(0.714-0.921) | 23      | <0.001  | 44.7            | 97.1          |
